# Supplementary material
Source: publisher figshare collection journal article supplement (https://diabetesjournals.figshare.com/articles/dataset/_/20427984)
Supplement: Supplementary file 1 [file 1]

## Sheet: SNPAnnotation
Supplemental Table S4: Annotation of Nominally Significant Variants
Position	rsID	Beta_estimate	p_value	Outcome	Ancestry	Risk_Allele	Beta from Mahajan	Direction of Effect the Same for T2D and Dementia	Overlapped.Gene	Type	Annotation	Nearest Upstream Gene	Type of Nearest Upstream Gene	Nearest Downstream Gene	Type of Nearest Downstream.Gene	Any Nearby Gene	Reference	Pathway	Associated Phenotypes	Beta from Kunkle	Kunkle p-value	Chromosome	Base Pair
1:39870793	rs3768301	0.267786	0.0290378	StrictAD	HIS	T	-0.072	FALSE	MACF1	protein_coding	intronic	None	None	None	None	MACF1			Heart Failure,Insulin,Insulin Resistance,Tunica Media,Hypothyroidism,Type 2 Diabetes| edema | rosiglitazone,Tobacco Use Disorder,Lipoproteins, HDL	0.0266	0.1256	1	39870793
1:64114429	rs11576729	-0.128751	0.0457504	Vascular_Dementia	AFR	G	0.031	FALSE	PGM1	protein_coding	intronic	None	None	None	None	PGM1		Disease,Metabolism,Immune System	Heart Failure,Insulin,Insulin Resistance,Tunica Media,Hypothyroidism,Birth Weight|Body Weight|Diabetes mellitus type II|Diabetes Mellitus, Type 2,longevity,Tobacco Use Disorder,Diabetes Mellitus, Insulin-Dependent|Diabetes Mellitus, Type 1,diabetes, type 1,tuberculosis,atherosclerosis, coronary; tuberculosis,type 1 diabetes,Cholesterol,Diabetes Mellitus, Type 1	0.0009	0.959	1	64114429
1:177889025	rs539515	-0.168422	0.0213059	StrictAD	AFR	C	-0.051	TRUE	None	None	None	RP11-63B19.1	lincRNA	SEC16B	protein_coding	RP11-63B19.1	Cooper et al 2011,Coe et al 2014		Hypothyroidism,Lipoproteins	-0.0057	0.7572	1	177889025
1:177889025	rs539515	0.109347	0.0485674	All_Cause_Dementia	HIS	C	-0.051	FALSE	None	None	None	RP11-63B19.1	lincRNA	SEC16B	protein_coding	RP11-63B19.1	Cooper et al 2011,Coe et al 2014		Hypothyroidism,Lipoproteins	-0.0057	0.7572	1	177889025
1:205107793	rs12039805	-0.0897733	0.0457697	All_Cause_Dementia	HIS	A	-0.032	TRUE	None	None	None	RP11-383G10.1	pseudogene	DSTYK	protein_coding	RP11-383G10.1	Coe et al 2014,Cooper et al 2011,Itsara et al 2009,1000 Genomes Consortium Phase 3			0.0098	0.5611	1	205107793
1:206600992	rs9429893	-0.188941	0.022982	Vascular_Dementia	AFR	A	0.042	FALSE	SRGAP2	protein_coding	intronic	None	None	None	None	SRGAP2	Conrad et al 2009		Type 2 Diabetes| edema | rosiglitazone,Tobacco Use Disorder	0.0144	0.3172	1	206600992
1:206600992	rs9429893	-0.0620648	0.0383159	Vascular_Dementia	EUR	A	0.042	FALSE	SRGAP2	protein_coding	intronic	None	None	None	None	SRGAP2	Conrad et al 2009		Type 2 Diabetes| edema | rosiglitazone,Tobacco Use Disorder	0.0144	0.3172	1	206600992
1:214150821	rs79687284	-0.739042	0.00656747	StrictAD	HIS	C	-0.21	TRUE	PROX1-AS1	antisense	non-coding intronic	None	None	None	None	PROX1-AS1				0.009	0.8878	1	214150821
1:219748818	rs2820446	0.212465	0.029667	StrictAD	HIS	C	0.045	TRUE	None	None	None	RP11-95P13.2	lincRNA	ZC3H11B	pseudogene	RP11-95P13.2	Wong et al 2007			-0.0323	0.04163	1	219748818
1:229672955	rs348330	0.0293648	0.013725	All_Cause_Dementia	EUR	G	0.062	TRUE	ABCB10	protein_coding	intronic	None	None	None	None	ABCB10		Transport of small molecules	Triglycerides,drug-related genes ,Acquired Immunodeficiency Syndrome|Disease Progression	-0.0249	0.1015	1	229672955
2:422144	rs62107261	-0.0592026	0.0176101	All_Cause_Dementia	EUR	T	0.13	FALSE	AC105393.2	lincRNA	non-coding	None	None	None	None	AC105393.2	Redon et al 2006,Wong et al 2007,Pinto et al 2007,Cooper et al 2011,1000 Genomes Consortium Phase 3,Suktitipat et al 2014,Locke et al 2006,Coe et al 2014,Park et al 2010			-0.026	0.5114	2	422144
2:653874	rs10188334	0.210297	0.0114567	Vascular_Dementia	AFR	C	0.068	TRUE	None	None	None	AC093326.3	lincRNA	TMEM18	protein_coding	AC093326.3	Redon et al 2006,Pinto et al 2007,Cooper et al 2011,1000 Genomes Consortium Phase 3,Suktitipat et al 2014,Coe et al 2014,Vogler et al 2010,Wong et al 2007,Itsara et al 2009			0.0223	0.233	2	653874
2:653874	rs10188334	0.0861772	0.048688	All_Cause_Dementia	AFR	C	0.068	TRUE	None	None	None	AC093326.3	lincRNA	TMEM18	protein_coding	AC093326.3	Redon et al 2006,Pinto et al 2007,Cooper et al 2011,1000 Genomes Consortium Phase 3,Suktitipat et al 2014,Coe et al 2014,Vogler et al 2010,Wong et al 2007,Itsara et al 2009			0.0223	0.233	2	653874
2:45192080	rs12712928	-0.0309829	0.0452882	All_Cause_Dementia	EUR	C	0.026	FALSE	AC012354.6	lincRNA	non-coding intronic	None	None	None	None	AC012354.6	Cooper et al 2011,Itsara et al 2009,Shaikh et al 2009,1000 Genomes Consortium Phase 3		Respiratory Function Tests,Stroke,E-Selectin,Body Mass Index,Fibrinogen,Bone Density,Triglycerides,Albumins	0.0153	0.458	2	45192080
2:58961136	rs17049712	-0.0618236	0.0292933	Vascular_Dementia	EUR	T	-0.035	TRUE	LINC01122	lincRNA	non-coding intronic	None	None	None	None	LINC01122	1000 Genomes Consortium Phase 3,Shaikh et al 2009		Respiratory Function Tests,Stroke,E-Selectin,Body Mass Index,Fibrinogen,Bone Density,Triglycerides,Albumins,C-Reactive Protein,Body Height	-0.0049	0.7535	2	58961136
2:65666674	rs6752053	0.0669789	0.00723261	StrictAD	EUR	T	0.056	TRUE	AC074391.1	lincRNA	non-coding intronic	None	None	None	None	AC074391.1			Respiratory Function Tests,Stroke,E-Selectin,Body Mass Index,Fibrinogen,Bone Density,Triglycerides,Albumins,C-Reactive Protein,Body Height	0.0163	0.2606	2	65666674
2:65666674	rs6752053	0.144336	0.0341414	StrictAD	AFR	T	0.056	TRUE	AC074391.1	lincRNA	non-coding intronic	None	None	None	None	AC074391.1			Respiratory Function Tests,Stroke,E-Selectin,Body Mass Index,Fibrinogen,Bone Density,Triglycerides,Albumins,C-Reactive Protein,Body Height	0.0163	0.2606	2	65666674
2:163649480	rs12614955	-0.227738	0.0195677	StrictAD	HIS	T	-0.04	TRUE	KCNH7	protein_coding	intronic	None	None	None	None	KCNH7		Neuronal System	Respiratory Function Tests,Multiple Sclerosis,multiple sclerosis,Type 2 Diabetes| edema | rosiglitazone,Tobacco Use Disorder,Psoriasis,Cholesterol, HDL	-0.0046	0.777	2	163649480
2:163649480	rs12614955	-0.135145	0.0334621	Vascular_Dementia	AFR	T	-0.04	TRUE	KCNH7	protein_coding	intronic	None	None	None	None	KCNH7		Neuronal System	Respiratory Function Tests,Multiple Sclerosis,multiple sclerosis,Type 2 Diabetes| edema | rosiglitazone,Tobacco Use Disorder,Psoriasis,Cholesterol, HDL	-0.0046	0.777	2	163649480
2:213818731	rs16849467	-0.107974	0.0279218	All_Cause_Dementia	HIS	T	0.005	FALSE	AC079610.1	sense_overlapping	non-coding intronic	None	None	None	None	AC079610.1	Wong et al 2007			0.022	0.1615	2	213818731
2:227100490	rs2943648	-0.0677236	0.0128578	Vascular_Dementia	EUR	G	-0.085	TRUE	None	None	None	AC068138.1	lincRNA	MIR5702	miRNA	AC068138.1	Coe et al 2014			-0.0114	0.4369	2	227100490
2:227100490	rs2943648	-0.0272938	0.0163792	All_Cause_Dementia	EUR	G	-0.085	TRUE	None	None	None	AC068138.1	lincRNA	MIR5702	miRNA	AC068138.1	Coe et al 2014			-0.0114	0.4369	2	227100490
2:227100490	rs2943648	-0.113199	0.025888	All_Cause_Dementia	HIS	G	-0.085	TRUE	None	None	None	AC068138.1	lincRNA	MIR5702	miRNA	AC068138.1	Coe et al 2014			-0.0114	0.4369	2	227100490
3:23457080	rs13094957	0.0338542	0.0134807	All_Cause_Dementia	EUR	T	0.097	TRUE	UBE2E2	protein_coding	intronic	None	None	None	None	UBE2E2	Coe et al 2014	Immune System	Body Weight,Menopause,Cholesterol, HDL,Triglycerides,Echocardiography,Blood Pressure,Alcoholism,Iron,Body Height,Type 2 diabetes,Tobacco Use Disorder,Carcinoma, Squamous Cell|Esophageal Neoplasms,Neuropsychological Tests,Body Weight Changes	0.0073	0.6834	3	23457080
3:23632174	rs76435632	-0.425409	0.017533	StrictAD	HIS	G	-0.12	TRUE	UBE2E2	protein_coding	3utr,3downstream	None	None	None	None	UBE2E2	Coe et al 2014,Cooper et al 2011,Itsara et al 2009	Immune System	Body Weight,Menopause,Cholesterol, HDL,Triglycerides,Echocardiography,Blood Pressure,Alcoholism,Iron,Body Height,Type 2 diabetes,Tobacco Use Disorder,Carcinoma, Squamous Cell|Esophageal Neoplasms,Neuropsychological Tests,Body Weight Changes	-0.0253	0.5515	3	23632174
3:54828827	rs76263492	1.70879	0.0352932	StrictAD	AFR	T	-0.11	FALSE	CACNA2D3	protein_coding	intronic	None	None	None	None	CACNA2D3	Coe et al 2014,Shaikh et al 2009	Muscle contraction,Neuronal System	Body Weight,Menopause,Cholesterol, HDL,Triglycerides,Echocardiography,Blood Pressure,Waist Circumference,Heart Function Tests,Tobacco Use Disorder,Celiac Disease|,Cholesterol, LDL,Lipoproteins,Iron,Pulse,Myocardial Infarction,Carotid Artery Diseases	0.0287	0.4242	3	54828827
3:58338809	rs12629058	-0.0609517	0.0277812	StrictAD	EUR	T	-0.032	TRUE	PXK	protein_coding	intronic	None	None	None	None	PXK	Shaikh et al 2009,Coe et al 2014		Body Weight,Menopause,Cholesterol, HDL,Triglycerides,Echocardiography,Blood Pressure,Waist Circumference,Heart Function Tests,Arthritis, Rheumatoid|Rheumatoid Arthritis,Autoimmune Diseases|Lupus Erythematosus, Systemic|Systemic lupus erythematosus,Lupus Erythematosus, Systemic|Systemic lupus erythematosus,Tobacco Use Disorder,systemic lupus erythematosus ,Lupus Erythematosus, Systemic,systemic lu…	0.0129	0.4388	3	58338809
3:64703394	rs66815886	0.0670068	0.0247256	All_Cause_Dementia	AFR	G	0.034	TRUE	ADAMTS9-AS2	antisense	non-coding intronic	None	None	None	None	ADAMTS9-AS2	Wong et al 2007		Body Weight,Menopause,Cholesterol, HDL,Triglycerides,Echocardiography,Blood Pressure,Waist Circumference,Heart Function Tests	-0.0404	0.01007	3	64703394
3:64703394	rs66815886	0.116497	0.0326502	Vascular_Dementia	AFR	G	0.034	TRUE	ADAMTS9-AS2	antisense	non-coding intronic	None	None	None	None	ADAMTS9-AS2	Wong et al 2007		Body Weight,Menopause,Cholesterol, HDL,Triglycerides,Echocardiography,Blood Pressure,Waist Circumference,Heart Function Tests	-0.0404	0.01007	3	64703394
3:64703394	rs66815886	0.0248328	0.0429418	All_Cause_Dementia	EUR	G	0.034	TRUE	ADAMTS9-AS2	antisense	non-coding intronic	None	None	None	None	ADAMTS9-AS2	Wong et al 2007		Body Weight,Menopause,Cholesterol, HDL,Triglycerides,Echocardiography,Blood Pressure,Waist Circumference,Heart Function Tests	-0.0404	0.01007	3	64703394
3:114960798	rs1459513	-0.615738	0.00456194	StrictAD	AFR	C	-0.015	TRUE	None	None	None	ZBTB20	protein_coding	RP11-190P13.2	lincRNA	ZBTB20	Coe et al 2014		Waist Circumference,Heart Function Tests	-0.0433	0.1705	3	114960798
3:151998053	rs1426385	-0.0700438	0.0254154	All_Cause_Dementia	AFR	A	0.049	FALSE	MBNL1	protein_coding	non-coding intronic,intronic	None	None	None	None	MBNL1			Waist Circumference,Heart Function Tests	0.0341	0.01797	3	151998053
3:151998053	rs1426385	0.0559577	0.0391424	StrictAD	EUR	A	0.049	TRUE	MBNL1	protein_coding	non-coding intronic,intronic	None	None	None	None	MBNL1			Waist Circumference,Heart Function Tests	0.0341	0.01797	3	151998053
3:186676455	rs9799068	-0.246799	0.0455541	StrictAD	HIS	A	0.032	FALSE	ST6GAL1	protein_coding	non-coding intronic,intronic	None	None	None	None	ST6GAL1	Gusev et al 2009,Suktitipat et al 2014,Coe et al 2014,Redon et al 2006	Metabolism of proteins	Tobacco Use Disorder,Floxacillin,Diabetes Mellitus, Type 2	-0.0077	0.7382	3	186676455
3:195825077	rs74289356	0.102456	0.0332469	StrictAD	EUR	T	-0.052	FALSE	None	None	None	TFRC	protein_coding	LINC00885	lincRNA	TFRC	Coe et al 2014,Cooper et al 2011			-0.0052	0.8491	3	195825077
4:1240299	rs730831	-0.169722	0.0342448	Vascular_Dementia	AFR	T	0.079	FALSE	CTBP1	protein_coding	intronic,non-coding intronic	None	None	None	None	CTBP1	Park et al 2010,Wong et al 2007,Cooper et al 2011,Itsara et al 2009	Disease,Signal Transduction,Metabolism of proteins	hypertension,diabetic nephropathy,Apoplexy|Cerebral Hemorrhage|Cerebral Hemorrhages|Intracranial Hemorrhages|Stroke|Subarachnoid Hemorrhage	0.0213	0.5497	4	1240299
4:1240299	rs730831	-0.0950258	0.035887	All_Cause_Dementia	AFR	T	0.079	FALSE	CTBP1	protein_coding	intronic,non-coding intronic	None	None	None	None	CTBP1	Park et al 2010,Wong et al 2007,Cooper et al 2011,Itsara et al 2009	Disease,Signal Transduction,Metabolism of proteins	hypertension,diabetic nephropathy,Apoplexy|Cerebral Hemorrhage|Cerebral Hemorrhages|Intracranial Hemorrhages|Stroke|Subarachnoid Hemorrhage	0.0213	0.5497	4	1240299
4:18047401	rs6855926	-0.0239763	0.0496687	All_Cause_Dementia	EUR	A	-0.013	TRUE	None	None	None	LCORL	protein_coding	RP11-608B3.1	lincRNA	LCORL			Prostatic Neoplasms,Cholesterol, LDL	0.0118	0.4517	4	18047401
4:71835822	rs7674402	-0.131638	0.012228	Vascular_Dementia	AFR	A	-0.046	TRUE	MOB1B	protein_coding	intronic,non-coding intronic	None	None	None	None	MOB1B		Signal Transduction	Cholesterol, LDL,Erythrocytes,Inflammatory Bowel Diseases	0.0161	0.6477	4	71835822
4:102135363	rs2659518	-0.155131	0.0259995	StrictAD	AFR	A	-0.03	TRUE	PPP3CA	protein_coding	intronic	None	None	None	None	PPP3CA	Coe et al 2014	Signal Transduction,Immune System	Erythrocytes,Inflammatory Bowel Diseases,Vitamin D,Chronic renal failure|Kidney Failure, Chronic,Type 2 Diabetes| edema | rosiglitazone,Alzheimer's disease,Tobacco Use Disorder,plasma HDL cholesterol (HDL-C) levels,Parkinson's disease ,Keratoconus	0.0157	0.5749	4	102135363
5:51791225	rs17261179	-0.060369	0.0204822	Vascular_Dementia	EUR	T	0.025	FALSE	None	None	None	RPS17P11	pseudogene	CTD-2141G3.1	pseudogene	RPS17P11	Pinto et al 2007,Cooper et al 2011,Itsara et al 2009,Jakobsson et al 2008		Cholesterol, HDL	0.0095	0.5143	5	51791225
5:53271420	rs702634	-0.0634057	0.025374	Vascular_Dementia	EUR	A	-0.045	TRUE	ARL15	protein_coding	intronic,non-coding intronic	None	None	None	None	ARL15	Coe et al 2014,Wong et al 2007		Cholesterol, HDL,obesity,Tobacco Use Disorder,Metabolic,Adiponectin levels,Macular Degeneration,Body Weight	0.0083	0.5928	5	53271420
5:55810305	rs256904	-0.120386	0.0226196	Vascular_Dementia	AFR	T	-0.077	TRUE	AC022431.2	protein_coding	intronic	None	None	None	None	AC022431.2	Coe et al 2014		Cholesterol, HDL	-0.0028	0.8649	5	55810305
5:55840633	rs42251	-0.0601769	0.0417698	Vascular_Dementia	EUR	A	0.00017	FALSE	AC022431.2	protein_coding	intronic	None	None	None	None	AC022431.2			Cholesterol, HDL	-0.0019	0.9022	5	55840633
5:55840633	rs42251	0.199943	0.0481167	StrictAD	HIS	A	0.00017	TRUE	AC022431.2	protein_coding	intronic	None	None	None	None	AC022431.2			Cholesterol, HDL	-0.0019	0.9022	5	55840633
5:67716793	rs57634870	-0.0616029	0.0328473	All_Cause_Dementia	AFR	G	-0.047	TRUE	None	None	None	CTD-2582M21.1	lincRNA	CTC-537E7.3	lincRNA	CTD-2582M21.1			Cholesterol, HDL	0.0102	0.6142	5	67716793
5:122704342	rs4267865	0.527125	0.0147536	Vascular_Dementia	HIS	G	0.095	TRUE	CEP120	protein_coding	intronic	None	None	None	None	CEP120	Wong et al 2007		Cardiovascular Diseases|Ventricular Dysfunction, Left,Body Weight,Magnesium	0.1136	0.01315	5	122704342
6:31139452	rs879882	0.0331783	0.00291619	All_Cause_Dementia	EUR	C	-0.057	FALSE	POU5F1	protein_coding	intronic,5upstream	None	None	None	None	POU5F1	Cooper et al 2011,Shaikh et al 2009,1000 Genomes Consortium Phase 3	Developmental Biology	Myocardial Infarction,Macular Degeneration,Hip,Behcet Syndrome,Leprosy,Lupus Erythematosus, Systemic,Sodium,Multiple Sclerosis,Leukocyte Count,Body Composition,Psoriasis,HIV-1,Stevens-Johnson Syndrome,Sclerosis,Abortion, Spontaneous,Tobacco Use Disorder	0.0166	0.2744	6	31139452
6:32373378	rs3806155	0.10865	0.000688916	All_Cause_Dementia	EUR	T	-0.16	FALSE	BTNL2	protein_coding	intronic	None	None	None	None	BTNL2	Cooper et al 2011,Wong et al 2007,Uddin et al 2014	Immune System	Myocardial Infarction,Macular Degeneration,Hip,Behcet Syndrome,Lupus Erythematosus, Systemic,Parkinson Disease,Spondylitis, Ankylosing,Diabetes Mellitus, Type 1,Multiple Sclerosis,Dermatitis, Atopic,Allopurinol,Psoriasis,Arthritis, Rheumatoid,Diabetic Nephropathies,Drug-Induced Liver Injury,Arthritis, Juvenile Rheumatoid,Graves Disease,Asthma,Berylliosis,Sarcoidosis,Osteoarthritis, Knee,Abortion,…	0.1045	0.05707	6	32373378
6:32439077	rs7452864	0.0289553	0.0135066	All_Cause_Dementia	EUR	C	-0.058	FALSE	HLA-DRB9	pseudogene	non-coding intronic	None	None	None	None	HLA-DRB9	Teague et al 2010,Cooper et al 2011,Wong et al 2007,Coe et al 2014,Suktitipat et al 2014,McCarroll et al 2008,Mokhtar et al 2014		rheumatoid arthritis,Lupus Erythematosus, Systemic,Psoriasis,diabetes, type 1 ,Arthritis, Rheumatoid|,Multiple Sclerosis,Diabetes Mellitus, Type 1,Hodgkin Disease,Colitis, Ulcerative,Arthritis, Rheumatoid,Cystic Fibrosis,Myocardial Infarction,Macular Degeneration,Hip,Behcet Syndrome,Parkinson Disease,Spondylitis, Ankylosing,Dermatitis, Atopic,Allopurinol	0.0238	0.1503	6	32439077
6:33524820	rs62405954	-0.392739	0.00253205	Vascular_Dementia	HIS	T	0.06	FALSE	None	None	None	RN7SL26P	misc_RNA	BAK1	protein_coding	RN7SL26P	1000 Genomes Consortium Phase 3		Myocardial Infarction,Macular Degeneration,Hip,Behcet Syndrome,Lupus Erythematosus, Systemic,Parkinson Disease,Spondylitis, Ankylosing,Diabetes Mellitus, Type 1,Multiple Sclerosis,Leprosy	0.0211	0.5028	6	33524820
6:34214670	rs4711389	0.173041	0.0357643	StrictAD	EUR	A	0.059	TRUE	C6orf1	protein_coding	3downstream,intronic,non-coding	None	None	None	None	C6orf1	Cooper et al 2011		Myocardial Infarction,Macular Degeneration,Hip,Behcet Syndrome,Lupus Erythematosus, Systemic,Parkinson Disease,Spondylitis, Ankylosing,Diabetes Mellitus, Type 1,Multiple Sclerosis,Leprosy,height,HIV Infections|[X]Human immunodeficiency virus disease,Type 2 Diabetes| edema | rosiglitazone,Tobacco Use Disorder,Body Height	0.0072	0.8749	6	34214670
6:38992668	rs2281342	-0.0257698	0.0247537	All_Cause_Dementia	EUR	T	0.016	FALSE	DNAH8	protein_coding	intronic	None	None	None	None	DNAH8	Coe et al 2014		Myocardial Infarction,Macular Degeneration,Hip,Behcet Syndrome,Lupus Erythematosus, Systemic,Parkinson Disease,Spondylitis, Ankylosing,Diabetes Mellitus, Type 1,Multiple Sclerosis,Leprosy,Tuberculosis, Pulmonary,Carcinoma, Squamous Cell|Esophageal Neoplasms,Hypertension,Blood Pressure	0.0249	0.09968	6	38992668
6:38992668	rs2281342	-0.0518494	0.0429383	StrictAD	EUR	T	0.016	FALSE	DNAH8	protein_coding	intronic	None	None	None	None	DNAH8	Coe et al 2014		Myocardial Infarction,Macular Degeneration,Hip,Behcet Syndrome,Lupus Erythematosus, Systemic,Parkinson Disease,Spondylitis, Ankylosing,Diabetes Mellitus, Type 1,Multiple Sclerosis,Leprosy,Tuberculosis, Pulmonary,Carcinoma, Squamous Cell|Esophageal Neoplasms,Hypertension,Blood Pressure	0.0249	0.09968	6	38992668
6:50788778	rs3798519	-0.227362	0.0141241	Vascular_Dementia	HIS	C	-0.083	TRUE	TFAP2B	protein_coding	5upstream,intronic	None	None	None	None	TFAP2B		Gene expression (Transcription),Metabolism of proteins	Myocardial Infarction,Macular Degeneration,Hip,Behcet Syndrome,Body Weights and Measures,C-Reactive Protein,Body Mass Index,Body Weight Changes,Cholesterol, HDL,Socioeconomic Factors,antisocial behavioural traits,obesity,personality traits,schizophrenia,anxiety disorder,dopamine D2 receptor density; monoamine metabolite concentrations,depression,diabetes, type 2,bipolar disorder,alcohol,Obesity,I…	-0.0119	0.5247	6	50788778
6:126792095	rs11759026	-0.128733	0.0077165	All_Cause_Dementia	HIS	G	-0.075	TRUE	None	None	None	CENPW	protein_coding	MIR588	miRNA	CENPW			Body Weights and Measures,C-Reactive Protein,Body Mass Index,Body Weight Changes,Cholesterol, HDL,Socioeconomic Factors,height	0.0175	0.31	6	126792095
6:131954797	rs7739842	-0.0873554	0.00945211	Vascular_Dementia	EUR	G	-0.055	TRUE	ENPP3	protein_coding	intronic	None	None	None	None	ENPP3	Perry et al 2008,Wong et al 2007	Metabolism	Body Weights and Measures,C-Reactive Protein,Body Mass Index,Body Weight Changes,Cholesterol, HDL,Socioeconomic Factors,Tobacco Use Disorder	-0.0353	0.05667	6	131954797
6:138855975	rs9376353	-0.0254111	0.0255917	All_Cause_Dementia	EUR	A	-0.033	TRUE	NHSL1	protein_coding	intronic	None	None	None	None	NHSL1	Pinto et al 2007		Alzheimer Disease,Echocardiography	0.0034	0.8154	6	138855975
7:13887008	rs12154701	-0.0604549	0.0243712	Vascular_Dementia	EUR	A	-0.019	TRUE	None	None	None	AC011288.2	lincRNA	AC005019.3	lincRNA	AC011288.2	Sebat et al 2004,Coe et al 2014,Shaikh et al 2009		Triglycerides	-0.0076	0.6013	7	13887008
7:14898282	rs17168486	0.114799	0.0173712	All_Cause_Dementia	AFR	T	-0.077	FALSE	DGKB	protein_coding	intronic,non-coding intronic	None	None	None	None	DGKB	Coe et al 2014,Cooper et al 2011,Redon et al 2006	Signal Transduction;Hemostasis,Signal Transduction,Hemostasis	Triglycerides,Narcolepsy,Type 2 Diabetes| edema | rosiglitazone,Type 2 diabetes,glucose-stimulated beta cell function,Tobacco Use Disorder,Erythrocyte Count,Hemoglobins,Precursor Cell Lymphoblastic Leukemia-Lymphoma,Bone Density,Echocardiography,Forced Expiratory Volume,Myocardial Infarction	-0.0238	0.2158	7	14898282
7:44178829	rs882019	0.117855	0.00608988	All_Cause_Dementia	HIS	G	-0.039	FALSE	MYL7	protein_coding	intronic,non-coding intronic,3downstream	None	None	None	None	MYL7	Perry et al 2008b,Perry et al 2008,Wong et al 2007	Muscle contraction		-0.0058	0.6904	7	44178829
7:44178829	rs882019	0.228189	0.0145086	StrictAD	HIS	G	-0.039	FALSE	MYL7	protein_coding	intronic,non-coding intronic,3downstream	None	None	None	None	MYL7	Perry et al 2008b,Perry et al 2008,Wong et al 2007	Muscle contraction		-0.0058	0.6904	7	44178829
7:102481891	rs7781557	-0.137044	0.0203266	All_Cause_Dementia	HIS	C	0.054	FALSE	FBXL13	protein_coding	intronic	None	None	None	None	FBXL13	Coe et al 2014,Pinto et al 2007,Jakobsson et al 2008,1000 Genomes Consortium Phase 3,Cooper et al 2011	Immune System,Metabolism of proteins	Tobacco Use Disorder	0.0077	0.6724	7	102481891
7:150537635	rs62492368	-0.226987	0.0140158	Vascular_Dementia	HIS	A	-0.049	TRUE	AOC1	protein_coding	intronic	None	None	None	None	AOC1	Cooper et al 2011,Coe et al 2014	Metabolism,Immune System	Parkinson's disease,asthma,Hypercholesterolemia|LDLC levels	0.0153	0.3214	7	150537635
7:150537635	rs62492368	-0.0891028	0.0458779	All_Cause_Dementia	HIS	A	-0.049	TRUE	AOC1	protein_coding	intronic	None	None	None	None	AOC1	Cooper et al 2011,Coe et al 2014	Metabolism,Immune System	Parkinson's disease,asthma,Hypercholesterolemia|LDLC levels	0.0153	0.3214	7	150537635
7:156794983	rs887609	-0.404044	0.00374006	Vascular_Dementia	HIS	A	0.0056	FALSE	MNX1	protein_coding	intronic	None	None	None	None	MNX1	Cooper et al 2011,Itsara et al 2009,Park et al 2010			0.0249	0.1925	7	156794983
8:19844415	rs7819706	0.0761646	0.0435688	StrictAD	EUR	A	0.073	TRUE	None	None	None	LPL	protein_coding	AC100802.3	antisense	LPL	Shaikh et al 2009,Cooper et al 2011,Suktitipat et al 2014,de Smith et al 2007,Coe et al 2014,1000 Genomes Consortium Phase 3		Lupus Erythematosus, Systemic,Arthritis, Rheumatoid	0.0044	0.835	8	19844415
8:41522991	rs508419	-0.250402	0.0265487	Vascular_Dementia	HIS	G	-0.089	TRUE	ANK1	protein_coding	5upstream,non-coding intronic,intronic	None	None	None	None	ANK1	Uddin et al 2014,Wong et al 2007	Developmental Biology,Metabolism of proteins,Metabolism of proteins;Vesicle-mediated transport,Vesicle-mediated transport	Lupus Erythematosus, Systemic,Arthritis, Rheumatoid,Tobacco Use Disorder,spherocytosis,Amyotrophic Lateral Sclerosis|,Diabetes Mellitus, Type 2	0.0017	0.9175	8	41522991
8:118184783	rs13266634	0.0655101	0.0210028	Vascular_Dementia	EUR	C	0.11	TRUE	SLC30A8	protein_coding	coding syn|nonsyn	None	None	None	None	SLC30A8	Coe et al 2014	Transport of small molecules,Metabolism of proteins	atherosclerosis,Type 2 diabetes,Diabetes mellitus type II|Diabetes Mellitus, Type 2|Glucose Metabolism Disorders,Diabetes mellitus type II|Diabetes Mellitus, Type 2,Type 2 diabetes|reduced prostate cancer risk,Erythrocyte Count,Hemoglobins,Asthma,diabetes, type 2,diabetes, type 2 triglycerides,Diabetes Mellitus, Type 2|Insulin Resistance,diabetes, type 1 ,diabetes, type 2 | diabetes, type 1,Coron…	-0.0347	0.02795	8	118184783
8:129569999	rs4733612	0.222419	0.0315812	Vascular_Dementia	HIS	G	0.048	TRUE	RP11-89M16.1	processed_transcript	3downstream,non-coding intronic	None	None	None	None	RP11-89M16.1	Cooper et al 2011,Itsara et al 2009,Shaikh et al 2009,Redon et al 2006			-0.0146	0.3722	8	129569999
8:145544720	rs3890400	-0.225486	0.0261837	StrictAD	HIS	A	-0.044	TRUE	DGAT1	protein_coding	intronic,non-coding intronic	None	None	None	None	DGAT1	Jakobsson et al 2008,Perry et al 2008b,Perry et al 2008,Cooper et al 2011,Park et al 2010	Metabolism,Immune System	body mass; cholesterol, HDL; blood pressure,obesity,Alzheimer's disease	0.0399	0.01248	8	145544720
9:4297892	rs4258054	-0.234363	0.0158166	StrictAD	HIS	T	0.041	FALSE	GLIS3	protein_coding	intronic,non-coding intronic	None	None	None	None	GLIS3	Coe et al 2014,Shaikh et al 2009,Suktitipat et al 2014		Cholesterol, LDL,diabetes, type 1 ,Tobacco Use Disorder,smoking cessation,type 1 diabetes,fasting glucose-related traits ,glucose-stimulated beta cell function,Diabetes Mellitus, Insulin-Dependent|Diabetes Mellitus, Type 1,Lipids,Triglycerides,Magnesium,Asthma,Respiratory Function Tests,Lymphocytes,Neutrophils,Lipoproteins, LDL,Eosinophils,Body Weights and Measures,Diabetes Mellitus, Type 2,Gluco…	0.0241	0.213	9	4297892
9:4297892	rs4258054	-0.194346	0.037777	Vascular_Dementia	HIS	T	0.041	FALSE	GLIS3	protein_coding	intronic,non-coding intronic	None	None	None	None	GLIS3	Coe et al 2014,Shaikh et al 2009,Suktitipat et al 2014		Cholesterol, LDL,diabetes, type 1 ,Tobacco Use Disorder,smoking cessation,type 1 diabetes,fasting glucose-related traits ,glucose-stimulated beta cell function,Diabetes Mellitus, Insulin-Dependent|Diabetes Mellitus, Type 1,Lipids,Triglycerides,Magnesium,Asthma,Respiratory Function Tests,Lymphocytes,Neutrophils,Lipoproteins, LDL,Eosinophils,Body Weights and Measures,Diabetes Mellitus, Type 2,Gluco…	0.0241	0.213	9	4297892
9:19074538	rs12380322	-0.0760653	0.00284337	StrictAD	EUR	G	-0.042	TRUE	HAUS6	protein_coding	intronic	None	None	None	None	HAUS6		Cell Cycle,Organelle biogenesis and maintenance	Body Mass Index,Respiratory Function Tests,Dehydroepiandrosterone,Acquired Immunodeficiency Syndrome,Cholesterol, LDL,Body Height,Varicose Veins,Tobacco Use Disorder	-0.0255	0.09899	9	19074538
9:21840834	rs7856455	0.195554	0.0415514	StrictAD	AFR	G	0.029	TRUE	MTAP	protein_coding	intronic	None	None	None	None	MTAP	Perry et al 2008	Metabolism,Immune System	Body Mass Index,Respiratory Function Tests,Dehydroepiandrosterone,Acquired Immunodeficiency Syndrome,Cholesterol, LDL,Body Height,Varicose Veins,diabetes, type 2,,Precursor Cell Lymphoblastic Leukemia-Lymphoma,Melanoma|Nevus|Precancerous Conditions|Skin Neoplasms,Brain Ischemia|Diabetes Mellitus|Hyperlipidemias|Hypertension|Intracranial Embolism,Myocardial Infarction,Cutaneous nevi,melanoma|Nevus…	0.0409	0.2791	9	21840834
9:22133984	rs10757282	-0.260557	0.00420017	Vascular_Dementia	HIS	C	-0.018	TRUE	None	None	None	CDKN2B-AS1	antisense	RP11-408N14.1	lincRNA	CDKN2B-AS1	Perry et al 2008,Coe et al 2014		Body Mass Index,Respiratory Function Tests,Dehydroepiandrosterone,Acquired Immunodeficiency Syndrome,Cholesterol, LDL,Body Height,Varicose Veins	-0.0005	0.9747	9	22133984
9:22133984	rs10757282	-0.0544116	0.0409688	Vascular_Dementia	EUR	C	-0.018	TRUE	None	None	None	CDKN2B-AS1	antisense	RP11-408N14.1	lincRNA	CDKN2B-AS1	Perry et al 2008,Coe et al 2014		Body Mass Index,Respiratory Function Tests,Dehydroepiandrosterone,Acquired Immunodeficiency Syndrome,Cholesterol, LDL,Body Height,Varicose Veins	-0.0005	0.9747	9	22133984
9:22133984	rs10757282	-0.0858895	0.0480848	All_Cause_Dementia	HIS	C	-0.018	TRUE	None	None	None	CDKN2B-AS1	antisense	RP11-408N14.1	lincRNA	CDKN2B-AS1	Perry et al 2008,Coe et al 2014		Body Mass Index,Respiratory Function Tests,Dehydroepiandrosterone,Acquired Immunodeficiency Syndrome,Cholesterol, LDL,Body Height,Varicose Veins	-0.0005	0.9747	9	22133984
9:34074476	rs12001437	-0.0638363	0.0279868	All_Cause_Dementia	AFR	C	-0.031	TRUE	None	None	None	RN7SKP114	misc_RNA	RP11-537H15.3	antisense	RN7SKP114	Shaikh et al 2009,1000 Genomes Consortium Phase 3,Wong et al 2007,Cooper et al 2011,Coe et al 2014		Body Mass Index,Respiratory Function Tests,Dehydroepiandrosterone,Acquired Immunodeficiency Syndrome,Cholesterol, LDL,Body Height,Varicose Veins	-0.0027	0.8558	9	34074476
9:83998346	rs9332453	-0.116501	0.0143352	All_Cause_Dementia	HIS	C	0.015	FALSE	None	None	None	RP11-289F5.1	lincRNA	RPS20P25	pseudogene	RP11-289F5.1	Sebat et al 2004			-0.0087	0.558	9	83998346
9:83998346	rs9332453	-0.20094	0.040474	Vascular_Dementia	HIS	C	0.015	FALSE	None	None	None	RP11-289F5.1	lincRNA	RPS20P25	pseudogene	RP11-289F5.1	Sebat et al 2004			-0.0087	0.558	9	83998346
9:83998346	rs9332453	-0.0529731	0.0417229	StrictAD	EUR	C	0.015	FALSE	None	None	None	RP11-289F5.1	lincRNA	RPS20P25	pseudogene	RP11-289F5.1	Sebat et al 2004			-0.0087	0.558	9	83998346
9:96971175	rs12345069	0.090199	0.00287966	StrictAD	EUR	C	0.034	TRUE	None	None	None	MIRLET7DHG	lincRNA	snoU13	snoRNA	MIRLET7DHG	Wong et al 2007,1000 Genomes Consortium Phase 3			-0.0032	0.8422	9	96971175
9:96971175	rs12345069	0.0262902	0.0483512	All_Cause_Dementia	EUR	C	0.034	TRUE	None	None	None	MIRLET7DHG	lincRNA	snoU13	snoRNA	MIRLET7DHG	Wong et al 2007,1000 Genomes Consortium Phase 3			-0.0032	0.8422	9	96971175
9:126015103	rs2416899	-0.269552	0.00351786	Vascular_Dementia	HIS	T	0.041	FALSE	STRBP	protein_coding	intronic	None	None	None	None	STRBP				-0.0024	0.9115	9	126015103
9:126015103	rs2416899	-0.207892	0.0327948	StrictAD	HIS	T	0.041	FALSE	STRBP	protein_coding	intronic	None	None	None	None	STRBP				-0.0024	0.9115	9	126015103
9:126015103	rs2416899	-0.0892208	0.0461829	All_Cause_Dementia	HIS	T	0.041	FALSE	STRBP	protein_coding	intronic	None	None	None	None	STRBP				-0.0024	0.9115	9	126015103
10:64974380	rs41274074	-0.672512	0.00918734	StrictAD	AFR	G	0.12	FALSE	JMJD1C	protein_coding	3downstream,coding nonsyn	None	None	None	None	JMJD1C		Hemostasis	Fatty Liver|Metabolic Syndrome X,Tobacco Use Disorder,lipid levels,liver enzymes,Alzheimer's disease ,plasma levels of liver enzymes,mean platelet volume,Hirschsprung Disease,Body Mass Index,Triglycerides,Schizophrenia,Arteries,Bipolar Disorder,Creatinine,Glomerular Filtration Rate,Cholesterol, LDL	0.0452	0.3297	10	64974380
10:71332301	rs41277236	-0.498087	0.0123377	StrictAD	HIS	T	-0.15	TRUE	NEUROG3	protein_coding	coding nonsyn	None	None	None	None	NEUROG3		Developmental Biology	Hirschsprung Disease,Body Mass Index,Triglycerides,Schizophrenia,Arteries,Bipolar Disorder,Creatinine,Glomerular Filtration Rate,Cholesterol, LDL,Type 2 diabetes,Anovulation|Diabetes Mellitus, Type 2|Diabetic Ketoacidosis,diabetes, type 2,diabetes, type 2; diabetes, type 1,glucose tolerance,Coronary Disease	0.0426	0.3074	10	71332301
10:80943841	rs703980	0.027228	0.0143635	All_Cause_Dementia	EUR	G	0.083	TRUE	ZMIZ1	protein_coding	intronic	None	None	None	None	ZMIZ1	Cooper et al 2011,Itsara et al 2009,Locke et al 2006,Coe et al 2014,Jakobsson et al 2008		Hirschsprung Disease,Body Mass Index,Triglycerides,Schizophrenia,Arteries,Bipolar Disorder,Creatinine,Glomerular Filtration Rate,Cholesterol, LDL,diabetes, type 1 ,Multiple Sclerosis,diabetes, type 2,Alzheimer's disease ,multiple sclerosis,inflammatory bowel disease (early onset),Celiac disease,Crohn Disease|Crohn's disease,Tobacco Use Disorder,Body Weight	-0.0281	0.04858	10	80943841
10:89766368	rs10887775	-0.188911	0.0287018	Vascular_Dementia	AFR	A	-0.042	TRUE	None	None	None	SNORD74	snoRNA	MED6P1	pseudogene	SNORD74	Cooper et al 2011		Hirschsprung Disease,Body Mass Index,Triglycerides,Schizophrenia,Arteries,Bipolar Disorder,Creatinine,Glomerular Filtration Rate,Cholesterol, LDL	0.0227	0.2619	10	89766368
10:94460650	rs10882099	0.0313386	0.00473079	All_Cause_Dementia	EUR	T	0.11	TRUE	None	None	None	HHEX	protein_coding	Y_RNA	misc_RNA	HHEX	Coe et al 2014,Park et al 2010		Hirschsprung Disease,Body Mass Index,Triglycerides,Schizophrenia,Arteries,Bipolar Disorder,Creatinine,Glomerular Filtration Rate,Cholesterol, LDL,Coronary Artery Disease	0.0087	0.5483	10	94460650
10:94479107	rs1112718	0.0333794	0.00236587	All_Cause_Dementia	EUR	A	0.11	TRUE	None	None	None	Y_RNA	misc_RNA	EXOC6	protein_coding	Y_RNA			Hirschsprung Disease,Body Mass Index,Triglycerides,Schizophrenia,Arteries,Bipolar Disorder,Creatinine,Glomerular Filtration Rate,Cholesterol, LDL,Coronary Artery Disease	-0.0037	0.7991	10	94479107
10:99056190	rs10748694	0.0626428	0.0119207	StrictAD	EUR	A	0.034	TRUE	None	None	None	ARHGAP19-SLIT1	protein_coding	RP11-452K12.3	pseudogene	ARHGAP19-SLIT1	Wong et al 2007		Triglycerides,Schizophrenia,Arteries,Bipolar Disorder,Creatinine,Glomerular Filtration Rate,Cholesterol, LDL,Coronary Artery Disease,Dehydroepiandrosterone Sulfate,Hirschsprung Disease,Body Mass Index	0.0062	0.6655	10	99056190
10:114428364	rs2859885	0.102998	0.0487574	All_Cause_Dementia	HIS	C	0.024	TRUE	VTI1A	protein_coding	intronic	None	None	None	None	VTI1A		Vesicle-mediated transport	Hirschsprung Disease,Coronary Artery Disease,Dehydroepiandrosterone Sulfate,Iron,Alkaline Phosphatase,Alzheimer's disease ,Brain Ischemia|Cardiovascular Diseases|Coronary Disease|Stroke,Coronary Disease|Coronary heart disease|Myocardial Infarction,Tobacco Use Disorder,Lipoproteins, LDL	0.0015	0.9355	10	114428364
10:114552267	rs10787461	-0.0658549	0.0173636	Vascular_Dementia	EUR	G	-0.0099	TRUE	VTI1A	protein_coding	intronic	None	None	None	None	VTI1A		Vesicle-mediated transport	Hirschsprung Disease,Coronary Artery Disease,Dehydroepiandrosterone Sulfate,Iron,Alkaline Phosphatase,Alzheimer's disease ,Brain Ischemia|Cardiovascular Diseases|Coronary Disease|Stroke,Coronary Disease|Coronary heart disease|Myocardial Infarction,Tobacco Use Disorder,Lipoproteins, LDL,Heart Function Tests	0.0136	0.3667	10	114552267
10:114736670	rs114322470	-0.302258	0.0266913	All_Cause_Dementia	HIS	T	0.19	FALSE	TCF7L2	protein_coding	intronic	None	None	None	None	TCF7L2		Disease,Signal Transduction,Gene expression (Transcription),Metabolism of proteins	diabetes, type 2,coronary artery disease,Diabetes Mellitus, Type 2|,Insulin Resistance|Overweight|Weight Loss,Glucose Intolerance,type 2 diabetes,type 2 diabetes and other traits,Type 2 diabetes,prostate cancer,Hypertension|Metabolic Syndrome X|Obesity,Diabetes Mellitus|Diabetes Mellitus, Type 2|Insulin Resistance|Metabolic Syndrome X,atherosclerosis,Diabetes Mellitus,Atherosclerosis|Hypertension…	0.073	0.2511	10	114736670
10:115016408	rs12257761	0.163482	0.0223418	StrictAD	AFR	T	-0.0015	FALSE	None	None	None	TCF7L2	protein_coding	RNU7-165P	snRNA	TCF7L2			Hirschsprung Disease,Coronary Artery Disease,Dehydroepiandrosterone Sulfate,Iron,Alkaline Phosphatase	-0.0015	0.9498	10	115016408
10:115119864	rs7093035	-0.193516	0.000910026	All_Cause_Dementia	AFR	G	-0.031	TRUE	None	None	None	RNU7-165P	snRNA	RP11-481H12.1	pseudogene	RNU7-165P			Hirschsprung Disease,Coronary Artery Disease,Dehydroepiandrosterone Sulfate,Iron,Alkaline Phosphatase	-0.0305	0.2393	10	115119864
10:115119864	rs7093035	-0.270442	0.0421873	StrictAD	AFR	G	-0.031	TRUE	None	None	None	RNU7-165P	snRNA	RP11-481H12.1	pseudogene	RNU7-165P			Hirschsprung Disease,Coronary Artery Disease,Dehydroepiandrosterone Sulfate,Iron,Alkaline Phosphatase	-0.0305	0.2393	10	115119864
10:122909625	rs2172073	-0.190934	0.00363814	All_Cause_Dementia	HIS	A	-0.071	TRUE	None	None	None	RP11-159H3.1	pseudogene	LINC01153	lincRNA	RP11-159H3.1	Wong et al 2007,Coe et al 2014,Jakobsson et al 2008		Coronary Artery Disease,Dehydroepiandrosterone Sulfate,Iron,Alkaline Phosphatase,Magnesium,Blood Pressure	0.0142	0.7816	10	122909625
10:122909625	rs2172073	-0.331701	0.0279285	StrictAD	HIS	A	-0.071	TRUE	None	None	None	RP11-159H3.1	pseudogene	LINC01153	lincRNA	RP11-159H3.1	Wong et al 2007,Coe et al 2014,Jakobsson et al 2008		Coronary Artery Disease,Dehydroepiandrosterone Sulfate,Iron,Alkaline Phosphatase,Magnesium,Blood Pressure	0.0142	0.7816	10	122909625
10:124167512	rs2421016	0.0331008	0.00255356	All_Cause_Dementia	EUR	C	0.027	TRUE	PLEKHA1	protein_coding	intronic,non-coding intronic	None	None	None	None	PLEKHA1	Coe et al 2014	Metabolism	Coronary Artery Disease,Dehydroepiandrosterone Sulfate,Iron,Alkaline Phosphatase,Magnesium,Blood Pressure,Macular Degeneration,atherosclerosis,macular degeneration, age-related,age-related maculopathy,height,Body Height	-0.0445	0.001753	10	124167512
10:124167512	rs2421016	0.0637431	0.0384231	All_Cause_Dementia	AFR	C	0.027	TRUE	PLEKHA1	protein_coding	intronic,non-coding intronic	None	None	None	None	PLEKHA1	Coe et al 2014	Metabolism	Coronary Artery Disease,Dehydroepiandrosterone Sulfate,Iron,Alkaline Phosphatase,Magnesium,Blood Pressure,Macular Degeneration,atherosclerosis,macular degeneration, age-related,age-related maculopathy,height,Body Height	-0.0445	0.001753	10	124167512
11:2194420	rs10770142	0.109371	0.034917	Vascular_Dementia	AFR	G	0.08	TRUE	None	None	None	MIR4686	miRNA	ASCL2	protein_coding	MIR4686	Cooper et al 2011,Itsara et al 2009,Jakobsson et al 2008			-0.0119	0.4383	11	2194420
11:2579163	rs2283164	0.713816	0.00740562	Vascular_Dementia	HIS	A	0.077	TRUE	KCNQ1	protein_coding	intronic	None	None	None	None	KCNQ1	Coe et al 2014,Jakobsson et al 2008	Muscle contraction,Neuronal System	Long QT Syndrome,Brugada Syndrome|Chromosome Deletion|Death, Sudden, Cardiac|Long QT Syndrome|Sudden Cardiac Death,Death, Sudden,Diabetes Mellitus, Type 2,Arrhythmias, Cardiac|Long QT Syndrome,Gastroparesis,Diabetes mellitus|HIV Infections|[X]Human immunodeficiency virus disease,obesity,Type 2 diabetes,Coronary Artery Disease|Diabetes mellitus type II|Diabetes Mellitus, Type 2|Dyslipidemias,Diabe…	-0.028	0.4387	11	2579163
11:2634177	rs80102379	1.55591	0.0452743	Vascular_Dementia	HIS	G	0.11	TRUE	KCNQ1	protein_coding	intronic	None	None	None	None	KCNQ1	Coe et al 2014,Shaikh et al 2009	Muscle contraction,Neuronal System	Long QT Syndrome,Brugada Syndrome|Chromosome Deletion|Death, Sudden, Cardiac|Long QT Syndrome|Sudden Cardiac Death,Death, Sudden,Diabetes Mellitus, Type 2,Arrhythmias, Cardiac|Long QT Syndrome,Gastroparesis,Diabetes mellitus|HIV Infections|[X]Human immunodeficiency virus disease,obesity,Type 2 diabetes,Coronary Artery Disease|Diabetes mellitus type II|Diabetes Mellitus, Type 2|Dyslipidemias,Diabe…	-0.1196	0.08418	11	2634177
11:2691500	rs231361	-0.14808	0.00565597	Vascular_Dementia	AFR	A	-0.078	TRUE	KCNQ1	protein_coding	intronic	None	None	None	None	KCNQ1	Coe et al 2014	Muscle contraction,Neuronal System	Arrhythmias, Cardiac|Death, Sudden, Cardiac|Myocardial Infarction,Sudden Infant Death,Arrhythmias, Cardiac|,QT interval,protein quantitative trait loci,Posttransplantation diabetes mellitus (PTDM),type 2 diabetes,diabetes, type 2,Electrocardiography,Platelet Aggregation,Arteries,EKG, abnormal,Diabetes Mellitus, Type 2,Long QT Syndrome,Brugada Syndrome|Chromosome Deletion|Death, Sudden, Cardiac|Lo…	0.0208	0.2265	11	2691500
11:2691500	rs231361	0.063856	0.036081	Vascular_Dementia	EUR	A	-0.078	FALSE	KCNQ1	protein_coding	intronic	None	None	None	None	KCNQ1	Coe et al 2014	Muscle contraction,Neuronal System	Arrhythmias, Cardiac|Death, Sudden, Cardiac|Myocardial Infarction,Sudden Infant Death,Arrhythmias, Cardiac|,QT interval,protein quantitative trait loci,Posttransplantation diabetes mellitus (PTDM),type 2 diabetes,diabetes, type 2,Electrocardiography,Platelet Aggregation,Arteries,EKG, abnormal,Diabetes Mellitus, Type 2,Long QT Syndrome,Brugada Syndrome|Chromosome Deletion|Death, Sudden, Cardiac|Lo…	0.0208	0.2265	11	2691500
11:2857897	rs234866	0.266115	0.0333838	StrictAD	HIS	G	0.08	TRUE	KCNQ1	protein_coding	intronic,non-coding intronic	None	None	None	None	KCNQ1	Redon et al 2006,Coe et al 2014,Jakobsson et al 2008,Perry et al 2008	Muscle contraction,Neuronal System	Arrhythmias, Cardiac|,QT interval,protein quantitative trait loci,Posttransplantation diabetes mellitus (PTDM),type 2 diabetes,diabetes, type 2,Electrocardiography,Platelet Aggregation,Arteries,Diabetes Mellitus, Type 2,Fibrinogen,Platelet Count,L-Lactate Dehydrogenase,Body Height,Long QT Syndrome,Brugada Syndrome|Chromosome Deletion|Death, Sudden, Cardiac|Long QT Syndrome|Sudden Cardiac Death,De…	-0.0041	0.8039	11	2857897
11:2908754	rs445084	0.0667381	0.0149794	Vascular_Dementia	EUR	G	-0.025	FALSE	None	None	None	CDKN1C	protein_coding	SLC22A18AS	protein_coding	CDKN1C	Redon et al 2006,Jakobsson et al 2008,Cooper et al 2011,Park et al 2010,Itsara et al 2009,Wong et al 2007			-0.0063	0.6837	11	2908754
11:2908754	rs445084	-0.0275278	0.0155566	All_Cause_Dementia	EUR	G	-0.025	TRUE	None	None	None	CDKN1C	protein_coding	SLC22A18AS	protein_coding	CDKN1C	Redon et al 2006,Jakobsson et al 2008,Cooper et al 2011,Park et al 2010,Itsara et al 2009,Wong et al 2007			-0.0063	0.6837	11	2908754
11:8654528	rs10769936	-0.0594025	0.040564	Vascular_Dementia	EUR	C	-0.045	TRUE	TRIM66	protein_coding	non-coding intronic,intronic	None	None	None	None	TRIM66	Pinto et al 2007		Obesity,Menarche	-0.021	0.1794	11	8654528
11:32927778	rs145678014	-0.657615	0.0442136	StrictAD	AFR	G	0.088	FALSE	QSER1	protein_coding	intronic,non-coding intronic	None	None	None	None	QSER1	Redon et al 2006,Pinto et al 2007		Myocardial Infarction,Asthma,Attention Deficit Disorder with Hyperactivity,HIV-1,Lipoproteins,Stroke,Arteries,Cell Adhesion Molecules,Hemoglobin A, Glycosylated,Bipolar Disorder,Echocardiography,Depressive Disorder, Major,Tuberculosis,Parkinson's disease (age of onset)	0.0195	0.6142	11	32927778
11:43816200	rs6485462	0.104563	0.0436532	Vascular_Dementia	AFR	C	0.034	TRUE	HSD17B12	protein_coding	intronic,non-coding intronic	None	None	None	None	HSD17B12	Wong et al 2007	Metabolism	Myocardial Infarction,Asthma,Attention Deficit Disorder with Hyperactivity,HIV-1,Lipoproteins,Stroke,Arteries,Cell Adhesion Molecules,Hemoglobin A, Glycosylated,Bipolar Disorder,Narcolepsy,ovarian cancer | breast cancer ,Neuroblastoma	-0.009	0.5618	11	43816200
11:45858584	rs12419690	0.213307	0.0233244	StrictAD	HIS	G	0.036	TRUE	None	None	None	CTD-2210P24.6	lincRNA	CRY2	protein_coding	CTD-2210P24.6			Myocardial Infarction,Asthma,Attention Deficit Disorder with Hyperactivity,HIV-1,Lipoproteins,Stroke,Arteries,Cell Adhesion Molecules,Hemoglobin A, Glycosylated,Bipolar Disorder	-0.0568	7.898e-05	11	45858584
11:45858584	rs12419690	0.0954588	0.0262472	All_Cause_Dementia	HIS	G	0.036	TRUE	None	None	None	CTD-2210P24.6	lincRNA	CRY2	protein_coding	CTD-2210P24.6			Myocardial Infarction,Asthma,Attention Deficit Disorder with Hyperactivity,HIV-1,Lipoproteins,Stroke,Arteries,Cell Adhesion Molecules,Hemoglobin A, Glycosylated,Bipolar Disorder	-0.0568	7.898e-05	11	45858584
11:65326154	rs12789028	0.295626	0.0396777	Vascular_Dementia	HIS	A	-0.073	FALSE	LTBP3	protein_coding	5upstream,5utr	None	None	None	None	LTBP3		Extracellular matrix organization	Myocardial Infarction,Asthma,Attention Deficit Disorder with Hyperactivity,HIV-1,Lipoproteins,Stroke,Arteries,Cell Adhesion Molecules,Bipolar Disorder,Bone Density,Diabetes Mellitus, Type 2,Lipoproteins, HDL,Glucose Tolerance Test,Gout,Hepatitis C, Chronic|Liver Cirrhosis	0.0235	0.22	11	65326154
11:128040810	rs10893827	-0.187882	0.0416809	Vascular_Dementia	HIS	A	0.07	FALSE	None	None	None	RP11-676M6.1	pseudogene	RP11-702B10.2	lincRNA	RP11-676M6.1			Myocardial Infarction,Asthma,Attention Deficit Disorder with Hyperactivity,HIV-1,Lipoproteins,Stroke,Arteries,Cell Adhesion Molecules	0.0271	0.1633	11	128040810
12:4384696	rs3217792	0.0652824	0.00114283	All_Cause_Dementia	EUR	C	0.14	TRUE	CCND2-AS1	antisense	non-coding intronic	None	None	None	None	CCND2-AS1	Iafrate et al 2004,Coe et al 2014,Wong et al 2007	Gene expression (Transcription),Cell Cycle	ovarian cancer,ovarian cancer ,diabetes, type 2,breast cancer ,major depressive disorder,breast cancer,Chronic renal failure|Kidney Failure, Chronic,Narcolepsy,Carcinoma, Hepatocellular|Hepatitis B|LCC - Liver cell carcinoma|Liver neoplasms	0.0396	0.1445	12	4384696
12:4384696	rs3217792	-0.39568	0.0150883	StrictAD	HIS	C	0.14	FALSE	CCND2-AS1	antisense	non-coding intronic	None	None	None	None	CCND2-AS1	Iafrate et al 2004,Coe et al 2014,Wong et al 2007	Gene expression (Transcription),Cell Cycle	ovarian cancer,ovarian cancer ,diabetes, type 2,breast cancer ,major depressive disorder,breast cancer,Chronic renal failure|Kidney Failure, Chronic,Narcolepsy,Carcinoma, Hepatocellular|Hepatitis B|LCC - Liver cell carcinoma|Liver neoplasms	0.0396	0.1445	12	4384696
12:4384696	rs3217792	0.100804	0.0269362	StrictAD	EUR	C	0.14	TRUE	CCND2-AS1	antisense	non-coding intronic	None	None	None	None	CCND2-AS1	Iafrate et al 2004,Coe et al 2014,Wong et al 2007	Gene expression (Transcription),Cell Cycle	ovarian cancer,ovarian cancer ,diabetes, type 2,breast cancer ,major depressive disorder,breast cancer,Chronic renal failure|Kidney Failure, Chronic,Narcolepsy,Carcinoma, Hepatocellular|Hepatitis B|LCC - Liver cell carcinoma|Liver neoplasms	0.0396	0.1445	12	4384696
12:4521511	rs78470967	-0.490303	0.00297861	All_Cause_Dementia	AFR	T	0.081	FALSE	None	None	None	FGF23	protein_coding	FGF6	protein_coding	FGF23	Iafrate et al 2004,Coe et al 2014,Cooper et al 2011			0.0358	0.3844	12	4521511
12:66360164	rs7970350	-0.0247267	0.0231897	All_Cause_Dementia	EUR	T	-0.067	TRUE	None	None	None	HMGA2	protein_coding	RP11-366L20.4	lincRNA	HMGA2			schizophrenia | bipolar disorder,Triglycerides	0.009	0.5306	12	66360164
12:97851611	rs7972074	-0.159473	0.0164363	Vascular_Dementia	AFR	C	0.042	FALSE	RMST	processed_transcript	non-coding intronic	None	None	None	None	RMST	Wong et al 2007		schizophrenia | bipolar disorder,Triglycerides,Waist Circumference,Erythrocyte Indices	-0.0093	0.6318	12	97851611
12:118412373	rs34965774	-0.125855	0.0257369	Vascular_Dementia	AFR	A	-0.061	TRUE	None	None	None	KSR2	protein_coding	RFC5	protein_coding	KSR2	Uddin et al 2014,Cooper et al 2011		schizophrenia | bipolar disorder,Waist Circumference,Erythrocyte Count,Hemoglobins	0.0196	0.3612	12	118412373
12:118412373	rs34965774	-0.0639854	0.0411903	All_Cause_Dementia	AFR	A	-0.061	TRUE	None	None	None	KSR2	protein_coding	RFC5	protein_coding	KSR2	Uddin et al 2014,Cooper et al 2011		schizophrenia | bipolar disorder,Waist Circumference,Erythrocyte Count,Hemoglobins	0.0196	0.3612	12	118412373
12:121416864	rs1800574	-0.852528	0.0104755	StrictAD	AFR	T	-0.15	TRUE	HNF1A-AS1	antisense	non-coding intronic	None	None	None	None	HNF1A-AS1	Shaikh et al 2009,Redon et al 2006	Developmental Biology	schizophrenia | bipolar disorder,Waist Circumference,Erythrocyte Count,Hemoglobins,Type 2 diabetes,obesity,Chronic renal failure|Kidney Failure, Chronic,Coronary Disease|Coronary heart disease|Myocardial Infarction,Coronary Artery Disease,Cardiovascular Diseases|Diabetes mellitus type II|Diabetes Mellitus, Type 2|Inflammation,Diabetes mellitus|Diabetes mellitus type II|Diabetes Mellitus, Type 2,F…	-0.053	0.2635	12	121416864
12:124545435	rs2451321	-0.135947	0.00222213	All_Cause_Dementia	HIS	C	-0.026	TRUE	FAM101A	protein_coding	intronic,non-coding intronic	None	None	None	None	FAM101A	Cooper et al 2011		Waist Circumference,Erythrocyte Count,Hemoglobins	0.0138	0.3408	12	124545435
12:124545435	rs2451321	-0.0584779	0.0306871	Vascular_Dementia	EUR	C	-0.026	TRUE	FAM101A	protein_coding	intronic,non-coding intronic	None	None	None	None	FAM101A	Cooper et al 2011		Waist Circumference,Erythrocyte Count,Hemoglobins	0.0138	0.3408	12	124545435
12:124545435	rs2451321	-0.204106	0.0348417	StrictAD	HIS	C	-0.026	TRUE	FAM101A	protein_coding	intronic,non-coding intronic	None	None	None	None	FAM101A	Cooper et al 2011		Waist Circumference,Erythrocyte Count,Hemoglobins	0.0138	0.3408	12	124545435
13:54107583	rs9568868	0.239806	0.0252508	Vascular_Dementia	HIS	T	-0.037	FALSE	None	None	None	AL450423.1	miRNA	LINC00558	lincRNA	AL450423.1	Uddin et al 2014,Coe et al 2014,1000 Genomes Consortium Phase 3		Heart Failure	-0.0145	0.5075	13	54107583
13:91942919	rs34165267	0.0274158	0.0318686	All_Cause_Dementia	EUR	C	0.03	TRUE	None	None	None	PPIAP23	pseudogene	MIR17HG	processed_transcript	PPIAP23	Coe et al 2014,Wong et al 2007		Heart Failure,Waist Circumference	-0.0141	0.3862	13	91942919
14:33303540	rs12883788	-0.0517104	0.0468126	Vascular_Dementia	EUR	T	-0.036	TRUE	None	None	None	AKAP6	protein_coding	NPAS3	protein_coding	AKAP6	Coe et al 2014		Stroke,Phospholipids	0.0005	0.9725	14	33303540
14:38803756	rs2183237	-0.227382	0.0181713	StrictAD	HIS	G	0.064	FALSE	None	None	None	RP11-96D24.1	lincRNA	RP11-14N4.1	pseudogene	RP11-96D24.1	Redon et al 2006,Coe et al 2014,Perry et al 2008		Stroke,Phospholipids	-0.0114	0.4814	14	38803756
14:38803756	rs2183237	0.0253964	0.0459458	All_Cause_Dementia	EUR	G	0.064	TRUE	None	None	None	RP11-96D24.1	lincRNA	RP11-14N4.1	pseudogene	RP11-96D24.1	Redon et al 2006,Coe et al 2014,Perry et al 2008		Stroke,Phospholipids	-0.0114	0.4814	14	38803756
14:79944099	rs8008910	0.151232	0.00608319	Vascular_Dementia	AFR	A	-0.057	FALSE	NRXN3	protein_coding	intronic,non-coding intronic	None	None	None	None	NRXN3	Coe et al 2014	Neuronal System	Stroke,Phospholipids,Alcoholism,obesity,Psychiatric Disorders,Tobacco Use Disorder,Diabetic Nephropathies,Hemoglobin A, Glycosylated,Coronary Disease,monocyte chemoattractant protein 1 (66-77),Blood Pressure Determination,Forced Expiratory Volume,Lipoproteins, VLDL,Body Weight Changes,schizophrenia,Obesity,several psychiatric disorders,Cleft Lip|Cleft Palate|Tooth Abnormalities,Body Mass Index	-0.015	0.3904	14	79944099
14:79944099	rs8008910	0.0813365	0.00742668	StrictAD	EUR	A	-0.057	FALSE	NRXN3	protein_coding	intronic,non-coding intronic	None	None	None	None	NRXN3	Coe et al 2014	Neuronal System	Stroke,Phospholipids,Alcoholism,obesity,Psychiatric Disorders,Tobacco Use Disorder,Diabetic Nephropathies,Hemoglobin A, Glycosylated,Coronary Disease,monocyte chemoattractant protein 1 (66-77),Blood Pressure Determination,Forced Expiratory Volume,Lipoproteins, VLDL,Body Weight Changes,schizophrenia,Obesity,several psychiatric disorders,Cleft Lip|Cleft Palate|Tooth Abnormalities,Body Mass Index	-0.015	0.3904	14	79944099
14:79944099	rs8008910	0.0286709	0.03165	All_Cause_Dementia	EUR	A	-0.057	FALSE	NRXN3	protein_coding	intronic,non-coding intronic	None	None	None	None	NRXN3	Coe et al 2014	Neuronal System	Stroke,Phospholipids,Alcoholism,obesity,Psychiatric Disorders,Tobacco Use Disorder,Diabetic Nephropathies,Hemoglobin A, Glycosylated,Coronary Disease,monocyte chemoattractant protein 1 (66-77),Blood Pressure Determination,Forced Expiratory Volume,Lipoproteins, VLDL,Body Weight Changes,schizophrenia,Obesity,several psychiatric disorders,Cleft Lip|Cleft Palate|Tooth Abnormalities,Body Mass Index	-0.015	0.3904	14	79944099
15:38843887	rs28582094	0.173483	0.0363884	StrictAD	AFR	G	-0.045	FALSE	RASGRP1	protein_coding	intronic	None	None	None	None	RASGRP1	Coe et al 2014,Shaikh et al 2009	Signal Transduction;Hemostasis,Immune System,Hemostasis,Signal Transduction,Signal Transduction;Immune System	diabetes, type 1 ,Autism,Bipolar disorder,type 1 diabetes,Drug-Induced Liver Injury|Precursor Cell Lymphoblastic Leukemia-Lymphoma,Diabetes Mellitus, Type 1	-0.033	0.04542	15	38843887
15:40616742	rs3743140	0.349245	0.0164683	StrictAD	HIS	A	-0.028	FALSE	None	None	None	RP11-133K1.6	lincRNA	LINC00984	antisense	RP11-133K1.6	Gusev et al 2009,Park et al 2010			-0.0033	0.8884	15	40616742
15:52517714	rs3825801	0.560882	0.0173169	StrictAD	HIS	C	0.064	TRUE	MYO5C	protein_coding	3utr,coding nonsyn	None	None	None	None	MYO5C	Wong et al 2007		Tobacco Use Disorder	0.0015	0.9496	15	52517714
15:52517714	rs3825801	-0.173611	0.0256867	All_Cause_Dementia	AFR	C	0.064	FALSE	MYO5C	protein_coding	3utr,coding nonsyn	None	None	None	None	MYO5C	Wong et al 2007		Tobacco Use Disorder	0.0015	0.9496	15	52517714
15:52517714	rs3825801	-0.37333	0.0274919	StrictAD	AFR	C	0.064	FALSE	MYO5C	protein_coding	3utr,coding nonsyn	None	None	None	None	MYO5C	Wong et al 2007		Tobacco Use Disorder	0.0015	0.9496	15	52517714
15:77776562	rs952472	0.239736	0.0119019	StrictAD	HIS	C	-0.076	FALSE	HMG20A	protein_coding	3utr,non-coding,3downstream	None	None	None	None	HMG20A	Coe et al 2014,Cooper et al 2011		Diabetes Mellitus, Type 2	0.0161	0.3029	15	77776562
15:90379632	rs6496609	0.143879	0.0376505	StrictAD	AFR	C	0.064	TRUE	AP3S2	protein_coding	non-coding intronic,intronic,3downstream	None	None	None	None	AP3S2			Carotid Artery Diseases|Plaque, Atherosclerotic,Diabetes Mellitus, Type 2	0.0252	0.1188	15	90379632
16:295795	rs6600191	-0.20158	0.0436864	StrictAD	HIS	T	0.061	FALSE	ITFG3	protein_coding	intronic	None	None	None	None	ITFG3	Coe et al 2014,Shaikh et al 2009,Uddin et al 2014,1000 Genomes Consortium Phase 3,Wong et al 2007		Tobacco Use Disorder,mean corpuscular hemoglobin,mean corpuscular volume	0.0052	0.7778	16	295795
16:30045789	rs11642430	0.0324265	0.00385569	All_Cause_Dementia	EUR	G	-0.042	FALSE	FAM57B	protein_coding	3downstream,non-coding intronic,intronic	None	None	None	None	FAM57B	1000 Genomes Consortium Phase 3		Diabetes Mellitus, Type 1	0.0391	0.008159	16	30045789
16:53809123	rs55872725	-0.0311077	0.00470254	All_Cause_Dementia	EUR	T	-0.12	TRUE	FTO	protein_coding	intronic,non-coding intronic	None	None	None	None	FTO		DNA Repair	obesity,Type 2 diabetes,Obesity,Weight Gain,Diabetes mellitus type II|Diabetes Mellitus, Type 2|Insulin Resistance,obesity|BMI,Diabetes mellitus|HIV Infections|[X]Human immunodeficiency virus disease,Metabolic Syndrome X,obesity|asthma,BMI,Obesity|POF - Premature ovarian failure|POLYCYSTIC OVARIAN SYNDROME|Polycystic Ovary Syndrome|Primary Ovarian Insufficiency|Puberty, Delayed|Puberty, Precociou…	0.0026	0.8567	16	53809123
16:53809123	rs55872725	-0.0595661	0.0156137	StrictAD	EUR	T	-0.12	TRUE	FTO	protein_coding	intronic,non-coding intronic	None	None	None	None	FTO		DNA Repair	obesity,Type 2 diabetes,Obesity,Weight Gain,Diabetes mellitus type II|Diabetes Mellitus, Type 2|Insulin Resistance,obesity|BMI,Diabetes mellitus|HIV Infections|[X]Human immunodeficiency virus disease,Metabolic Syndrome X,obesity|asthma,BMI,Obesity|POF - Premature ovarian failure|POLYCYSTIC OVARIAN SYNDROME|Polycystic Ovary Syndrome|Primary Ovarian Insufficiency|Puberty, Delayed|Puberty, Precociou…	0.0026	0.8567	16	53809123
16:53809123	rs55872725	-0.0531936	0.0419662	Vascular_Dementia	EUR	T	-0.12	TRUE	FTO	protein_coding	intronic,non-coding intronic	None	None	None	None	FTO		DNA Repair	obesity,Type 2 diabetes,Obesity,Weight Gain,Diabetes mellitus type II|Diabetes Mellitus, Type 2|Insulin Resistance,obesity|BMI,Diabetes mellitus|HIV Infections|[X]Human immunodeficiency virus disease,Metabolic Syndrome X,obesity|asthma,BMI,Obesity|POF - Premature ovarian failure|POLYCYSTIC OVARIAN SYNDROME|Polycystic Ovary Syndrome|Primary Ovarian Insufficiency|Puberty, Delayed|Puberty, Precociou…	0.0026	0.8567	16	53809123
16:73100308	rs6416749	0.0844738	0.00249128	Vascular_Dementia	EUR	C	0.013	TRUE	None	None	None	RP11-346C20.3	lincRNA	HCCAT5	lincRNA	RP11-346C20.3	Park et al 2010		Diabetes Mellitus, Type 1,Diabetes Mellitus	-0.0006	0.9737	16	73100308
16:73100308	rs6416749	0.063238	0.0372952	All_Cause_Dementia	AFR	C	0.013	TRUE	None	None	None	RP11-346C20.3	lincRNA	HCCAT5	lincRNA	RP11-346C20.3	Park et al 2010		Diabetes Mellitus, Type 1,Diabetes Mellitus	-0.0006	0.9737	16	73100308
16:81534790	rs2925979	-0.281133	0.0205814	StrictAD	HIS	T	0.034	FALSE	CMIP	protein_coding	intronic	None	None	None	None	CMIP	1000 Genomes Consortium Phase 3,Cooper et al 2011,Itsara et al 2009		Diabetes Mellitus, Type 1,Diabetes Mellitus,Tobacco Use Disorder,Diabetes Mellitus, Type 2,Tunica Media,Cholesterol, HDL,Adiponectin	-0.0067	0.6711	16	81534790
16:88554480	rs9937296	-0.0375379	0.0291603	All_Cause_Dementia	EUR	C	-0.042	TRUE	ZFPM1	protein_coding	intronic,non-coding intronic	None	None	None	None	ZFPM1	Coe et al 2014,Jakobsson et al 2008,Shaikh et al 2009,Redon et al 2006,Wang et al 2007	Hemostasis,Gene expression (Transcription)	Diabetes Mellitus, Type 1,Diabetes Mellitus,lung cancer,bladder cancer,chronic obstructive pulmonary disease,lung cancer	-0.0061	0.8012	16	88554480
17:3988451	rs8071043	0.137236	0.0485719	StrictAD	AFR	C	-0.053	FALSE	ZZEF1	protein_coding	intronic,non-coding intronic	None	None	None	None	ZZEF1	Wong et al 2007,Coe et al 2014		Tobacco Use Disorder	0.0222	0.1537	17	3988451
17:6953155	rs113748381	-0.125601	0.0336593	All_Cause_Dementia	EUR	A	0.05	FALSE	None	None	None	SLC16A11	protein_coding	CTD-2545G14.2	pseudogene	SLC16A11	Cooper et al 2011,Itsara et al 2009			0.047	0.6051	17	6953155
17:17751478	rs1108646	0.228704	0.013883	Vascular_Dementia	HIS	A	0.041	TRUE	TOM1L2	protein_coding	intronic,non-coding intronic	None	None	None	None	TOM1L2	Wong et al 2007,Shaikh et al 2009		Coronary Artery Disease,dementia	-0.022	0.1537	17	17751478
17:17751478	rs1108646	0.125624	0.0262069	Vascular_Dementia	AFR	A	0.041	TRUE	TOM1L2	protein_coding	intronic,non-coding intronic	None	None	None	None	TOM1L2	Wong et al 2007,Shaikh et al 2009		Coronary Artery Disease,dementia	-0.022	0.1537	17	17751478
17:17751478	rs1108646	0.062394	0.0464126	All_Cause_Dementia	AFR	A	0.041	TRUE	TOM1L2	protein_coding	intronic,non-coding intronic	None	None	None	None	TOM1L2	Wong et al 2007,Shaikh et al 2009		Coronary Artery Disease,dementia	-0.022	0.1537	17	17751478
17:62203128	rs57676627	-0.347137	0.0043773	StrictAD	HIS	T	-0.057	TRUE	ERN1	protein_coding	non-coding intronic,intronic	None	None	None	None	ERN1	Iafrate et al 2004	Metabolism of proteins	Coronary Artery Disease,Parkinson Disease,Hip,Head and Neck Neoplasms|Neoplasm Recurrence, Local|Neoplasms, Second Primary,Type 2 Diabetes| edema | rosiglitazone,Tobacco Use Disorder,Chronic renal failure|Kidney Failure, Chronic,Stroke	0.0071	0.7407	17	62203128
17:76792179	rs1044486	-0.0556742	0.0232809	StrictAD	EUR	G	0.03	FALSE	USP36	protein_coding	non-coding intronic,intronic,3utr,3downstream	None	None	None	None	USP36			Coronary Artery Disease,Parkinson Disease,Hip	-0.0186	0.1913	17	76792179
17:76792179	rs1044486	0.168881	0.0481031	Vascular_Dementia	AFR	G	0.03	TRUE	USP36	protein_coding	non-coding intronic,intronic,3utr,3downstream	None	None	None	None	USP36			Coronary Artery Disease,Parkinson Disease,Hip	-0.0186	0.1913	17	76792179
18:56876430	rs9957320	0.0745386	0.0367875	Vascular_Dementia	EUR	G	0.069	TRUE	None	None	None	SEC11C	protein_coding	GRP	protein_coding	SEC11C	Coe et al 2014			0.0027	0.8871	18	56876430
18:57829135	rs6567160	0.220673	0.0192175	StrictAD	AFR	C	-0.077	FALSE	None	None	None	RP11-795H16.3	lincRNA	RNU4-17P	snRNA	RP11-795H16.3	Coe et al 2014,Wong et al 2007,Cooper et al 2011,Itsara et al 2009		Attention Deficit Disorder with Hyperactivity	0.0334	0.04773	18	57829135
18:57829135	rs6567160	-0.0677417	0.0285893	Vascular_Dementia	EUR	C	-0.077	TRUE	None	None	None	RP11-795H16.3	lincRNA	RNU4-17P	snRNA	RP11-795H16.3	Coe et al 2014,Wong et al 2007,Cooper et al 2011,Itsara et al 2009		Attention Deficit Disorder with Hyperactivity	0.0334	0.04773	18	57829135
19:45326768	rs1871045	0.0927733	0.000465895	StrictAD	EUR	T	-0.029	FALSE	None	None	None	BCAM	protein_coding	PVRL2	protein_coding	BCAM			Smoking,Calcium	-0.1039	1.623e-12	19	45326768
19:45326768	rs1871045	0.0327471	0.00524217	All_Cause_Dementia	EUR	T	-0.029	FALSE	None	None	None	BCAM	protein_coding	PVRL2	protein_coding	BCAM			Smoking,Calcium	-0.1039	1.623e-12	19	45326768
19:45326768	rs1871045	0.0554939	0.0473064	Vascular_Dementia	EUR	T	-0.029	FALSE	None	None	None	BCAM	protein_coding	PVRL2	protein_coding	BCAM			Smoking,Calcium	-0.1039	1.623e-12	19	45326768
19:45326768	rs1871045	-0.142169	0.0482458	StrictAD	AFR	T	-0.029	TRUE	None	None	None	BCAM	protein_coding	PVRL2	protein_coding	BCAM			Smoking,Calcium	-0.1039	1.623e-12	19	45326768
19:45411941	rs429358	-0.567766	0	All_Cause_Dementia	EUR	T	0.061	FALSE	APOE	protein_coding	coding *nonsyn,3downstream,coding nonsyn	None	None	None	None	APOE		Gene expression (Transcription),Transport of small molecules,Vesicle-mediated transport,Signal Transduction,Signal Transduction;Metabolism,Metabolism,Metabolism of proteins	Subarachnoid Hemorrhage,Chronic progressive chorea|Huntington Disease,Alzheimer's disease,Alzheimer Disease|Alzheimer's Disease|Cardiovascular Diseases|Chronic Disease,diabetes, type 2,myocardial infarct; cholesterol, HDL; triglycerides; atherosclerosis, coronary; macular degeneration; colorectal cancer,Dementia,Herpes Labialis,Hypertension,Nephrotic Syndrome,Parkinson's disease,diabetes, type 1,…	-1.2017	0	19	45411941
19:45411941	rs429358	-1.04495	4.36478e-285	StrictAD	EUR	T	0.061	FALSE	APOE	protein_coding	coding *nonsyn,3downstream,coding nonsyn	None	None	None	None	APOE		Gene expression (Transcription),Transport of small molecules,Vesicle-mediated transport,Signal Transduction,Signal Transduction;Metabolism,Metabolism,Metabolism of proteins	Subarachnoid Hemorrhage,Chronic progressive chorea|Huntington Disease,Alzheimer's disease,Alzheimer Disease|Alzheimer's Disease|Cardiovascular Diseases|Chronic Disease,diabetes, type 2,myocardial infarct; cholesterol, HDL; triglycerides; atherosclerosis, coronary; macular degeneration; colorectal cancer,Dementia,Herpes Labialis,Hypertension,Nephrotic Syndrome,Parkinson's disease,diabetes, type 1,…	-1.2017	0	19	45411941
19:45411941	rs429358	-0.684272	9.0108e-99	Vascular_Dementia	EUR	T	0.061	FALSE	APOE	protein_coding	coding *nonsyn,3downstream,coding nonsyn	None	None	None	None	APOE		Gene expression (Transcription),Transport of small molecules,Vesicle-mediated transport,Signal Transduction,Signal Transduction;Metabolism,Metabolism,Metabolism of proteins	Subarachnoid Hemorrhage,Chronic progressive chorea|Huntington Disease,Alzheimer's disease,Alzheimer Disease|Alzheimer's Disease|Cardiovascular Diseases|Chronic Disease,diabetes, type 2,myocardial infarct; cholesterol, HDL; triglycerides; atherosclerosis, coronary; macular degeneration; colorectal cancer,Dementia,Herpes Labialis,Hypertension,Nephrotic Syndrome,Parkinson's disease,diabetes, type 1,…	-1.2017	0	19	45411941
19:45411941	rs429358	-0.968684	3.25401e-42	StrictAD	AFR	T	0.061	FALSE	APOE	protein_coding	coding *nonsyn,3downstream,coding nonsyn	None	None	None	None	APOE		Gene expression (Transcription),Transport of small molecules,Vesicle-mediated transport,Signal Transduction,Signal Transduction;Metabolism,Metabolism,Metabolism of proteins	Subarachnoid Hemorrhage,Chronic progressive chorea|Huntington Disease,Alzheimer's disease,Alzheimer Disease|Alzheimer's Disease|Cardiovascular Diseases|Chronic Disease,diabetes, type 2,myocardial infarct; cholesterol, HDL; triglycerides; atherosclerosis, coronary; macular degeneration; colorectal cancer,Dementia,Herpes Labialis,Hypertension,Nephrotic Syndrome,Parkinson's disease,diabetes, type 1,…	-1.2017	0	19	45411941
19:45411941	rs429358	-0.426678	1.16564e-39	All_Cause_Dementia	AFR	T	0.061	FALSE	APOE	protein_coding	coding *nonsyn,3downstream,coding nonsyn	None	None	None	None	APOE		Gene expression (Transcription),Transport of small molecules,Vesicle-mediated transport,Signal Transduction,Signal Transduction;Metabolism,Metabolism,Metabolism of proteins	Subarachnoid Hemorrhage,Chronic progressive chorea|Huntington Disease,Alzheimer's disease,Alzheimer Disease|Alzheimer's Disease|Cardiovascular Diseases|Chronic Disease,diabetes, type 2,myocardial infarct; cholesterol, HDL; triglycerides; atherosclerosis, coronary; macular degeneration; colorectal cancer,Dementia,Herpes Labialis,Hypertension,Nephrotic Syndrome,Parkinson's disease,diabetes, type 1,…	-1.2017	0	19	45411941
19:45411941	rs429358	-0.513017	8.0676e-19	Vascular_Dementia	AFR	T	0.061	FALSE	APOE	protein_coding	coding *nonsyn,3downstream,coding nonsyn	None	None	None	None	APOE		Gene expression (Transcription),Transport of small molecules,Vesicle-mediated transport,Signal Transduction,Signal Transduction;Metabolism,Metabolism,Metabolism of proteins	Subarachnoid Hemorrhage,Chronic progressive chorea|Huntington Disease,Alzheimer's disease,Alzheimer Disease|Alzheimer's Disease|Cardiovascular Diseases|Chronic Disease,diabetes, type 2,myocardial infarct; cholesterol, HDL; triglycerides; atherosclerosis, coronary; macular degeneration; colorectal cancer,Dementia,Herpes Labialis,Hypertension,Nephrotic Syndrome,Parkinson's disease,diabetes, type 1,…	-1.2017	0	19	45411941
19:45411941	rs429358	-0.933545	6.99393e-15	StrictAD	HIS	T	0.061	FALSE	APOE	protein_coding	coding *nonsyn,3downstream,coding nonsyn	None	None	None	None	APOE		Gene expression (Transcription),Transport of small molecules,Vesicle-mediated transport,Signal Transduction,Signal Transduction;Metabolism,Metabolism,Metabolism of proteins	Subarachnoid Hemorrhage,Chronic progressive chorea|Huntington Disease,Alzheimer's disease,Alzheimer Disease|Alzheimer's Disease|Cardiovascular Diseases|Chronic Disease,diabetes, type 2,myocardial infarct; cholesterol, HDL; triglycerides; atherosclerosis, coronary; macular degeneration; colorectal cancer,Dementia,Herpes Labialis,Hypertension,Nephrotic Syndrome,Parkinson's disease,diabetes, type 1,…	-1.2017	0	19	45411941
19:45411941	rs429358	-0.442149	4.77373e-13	All_Cause_Dementia	HIS	T	0.061	FALSE	APOE	protein_coding	coding *nonsyn,3downstream,coding nonsyn	None	None	None	None	APOE		Gene expression (Transcription),Transport of small molecules,Vesicle-mediated transport,Signal Transduction,Signal Transduction;Metabolism,Metabolism,Metabolism of proteins	Subarachnoid Hemorrhage,Chronic progressive chorea|Huntington Disease,Alzheimer's disease,Alzheimer Disease|Alzheimer's Disease|Cardiovascular Diseases|Chronic Disease,diabetes, type 2,myocardial infarct; cholesterol, HDL; triglycerides; atherosclerosis, coronary; macular degeneration; colorectal cancer,Dementia,Herpes Labialis,Hypertension,Nephrotic Syndrome,Parkinson's disease,diabetes, type 1,…	-1.2017	0	19	45411941
19:45411941	rs429358	-0.566336	3.8442e-06	Vascular_Dementia	HIS	T	0.061	FALSE	APOE	protein_coding	coding *nonsyn,3downstream,coding nonsyn	None	None	None	None	APOE		Gene expression (Transcription),Transport of small molecules,Vesicle-mediated transport,Signal Transduction,Signal Transduction;Metabolism,Metabolism,Metabolism of proteins	Subarachnoid Hemorrhage,Chronic progressive chorea|Huntington Disease,Alzheimer's disease,Alzheimer Disease|Alzheimer's Disease|Cardiovascular Diseases|Chronic Disease,diabetes, type 2,myocardial infarct; cholesterol, HDL; triglycerides; atherosclerosis, coronary; macular degeneration; colorectal cancer,Dementia,Herpes Labialis,Hypertension,Nephrotic Syndrome,Parkinson's disease,diabetes, type 1,…	-1.2017	0	19	45411941
19:46178661	rs2238689	-0.02428	0.0266188	All_Cause_Dementia	EUR	C	-0.064	TRUE	GIPR	protein_coding	non-coding,intronic	None	None	None	None	GIPR		Signal Transduction,Disease	Smoking,Calcium,Body Mass Index,diabetes, type 2,Obesity,Multiple Sclerosis,two-hour glucose challenge ,Cardiovascular Diseases|Diabetes mellitus type II|Diabetes Mellitus, Type 2|Metabolic Syndrome X,Body Weight|Glucose Intolerance|Insulin Resistance|Obesity,Hyperparathyroidism, Secondary	0.0183	0.2243	19	46178661
20:22427370	rs2181063	-0.236637	0.0482647	StrictAD	HIS	C	0.041	FALSE	None	None	None	RP5-1004I9.1	lincRNA	LINC00261	lincRNA	RP5-1004I9.1	Wong et al 2007		Stroke,Menopause	0.0056	0.7634	20	22427370
20:45596378	rs6063046	-0.0602238	0.0265524	StrictAD	EUR	A	0.056	FALSE	EYA2	protein_coding	intronic	None	None	None	None	EYA2	Coe et al 2014	DNA Repair	Menopause,Neuroblastoma,lung cancer ,Type 2 Diabetes| edema | rosiglitazone,Tobacco Use Disorder,Alcoholism,Blood Flow Velocity,monocyte chemoattractant protein 1 (66-77)	0.033	0.04069	20	45596378
20:48832020	rs6091115	-0.0240502	0.0281519	All_Cause_Dementia	EUR	T	0.049	FALSE	None	None	None	CEBPB	protein_coding	RP11-290F20.3	lincRNA	CEBPB	Coe et al 2014,Gusev et al 2009,Shaikh et al 2009		Menopause,Neuroblastoma	0.0185	0.2162	20	48832020
20:48832020	rs6091115	-0.0497966	0.0425425	StrictAD	EUR	T	0.049	FALSE	None	None	None	CEBPB	protein_coding	RP11-290F20.3	lincRNA	CEBPB	Coe et al 2014,Gusev et al 2009,Shaikh et al 2009		Menopause,Neuroblastoma	0.0185	0.2162	20	48832020
20:48832020	rs6091115	-0.0519246	0.0462697	Vascular_Dementia	EUR	T	0.049	FALSE	None	None	None	CEBPB	protein_coding	RP11-290F20.3	lincRNA	CEBPB	Coe et al 2014,Gusev et al 2009,Shaikh et al 2009		Menopause,Neuroblastoma	0.0185	0.2162	20	48832020
20:57387352	rs736266	0.122729	0.0416825	Vascular_Dementia	AFR	T	-0.054	FALSE	None	None	None	PIEZO1P2	pseudogene	MIR296	lincRNA	PIEZO1P2			Menopause,Neuroblastoma	-0.0219	0.1226	20	57387352
22:30205572	rs36575	-0.227665	0.00788894	All_Cause_Dementia	HIS	C	0.06	FALSE	ASCC2	protein_coding	intronic,non-coding intronic	None	None	None	None	ASCC2		DNA Repair		0.0514	0.04447	22	30205572
